# Supplementary material
Source: PubMed Central journal article supplement (PMC7904569)
Supplement: NIHMS1625722-supplement-Supplemental_Data_File_1.pdf [file NIHMS1625722-supplement-Supplemental_Data_File_1.pdf]

# Exploring the Diagnostic Tests and Biomarkers Used in Clinical Diagnosis of Dementia with Lewy Bodies

The purpose of this survey is to learn which diagnostic tests and biomarkers Lewy Body Dementia Association Research Center of Excellence participants use in the clinical diagnosis of dementia with Lewy bodies (DLB). This information will help us understand current practices and which biomarkers are regularly accessible in clinical care at specialty centers. We are doing this survey as a quality improvement/research study. Participation is voluntary.

The survey asks identical questions for 9 different diagnostic tests/biomarkers. We estimate the survey will take fewer than 10 minutes to complete. Responses are anonymous and are not linked to the email address through which you received the survey link. There are no foreseeable risks associated with completing this survey. There are no direct benefits to you, but this will help the LBDA RCOE program understand current practices and test availability. We anticipate presenting the results at the LBDA RCOE investigator meeting in June. You can contact Melissa Armstrong (Melissa.armstrong@neurology.ufl.edu) if you have questions about the survey. We ask that you complete the survey in the next 4 weeks.

The survey was reviewed by the University of Florida Health Science Center IRB. You can contact them at 352-273-9600 if you have questions.

Thank you in advance for participating.

## Dopamine Transporter Imaging

Does your site have the capability to do dopamine transporter imaging?

- Yes  
 No  
 I don't know  
 (e.g. DaT-SPECT, [123I]FP-CIT SPECT)

Have you ever used dopamine transporter imaging in the diagnosis of DLB?

- Yes  
 No  
 (e.g. DaT-SPECT, [123I]FP-CIT SPECT)

How often do you use dopamine transporter imaging in the diagnosis of DLB?

- < 25%  
 25-49%  
 50-75%  
 >75%  
 (e.g. DaT-SPECT, [123I]FP-CIT SPECT)

Why have you not used dopamine transporter imaging?

(e.g. DaT-SPECT, [123I]FP-CIT SPECT)

In what setting do you think dopamine transporter imaging is the most helpful in the context of DLB?

(e.g. MCI stages? Differentiating DLB versus specific other pathology? Please be specific.)

Do you have any comments on the use of dopamine transporter imaging?

**MIBG Scintigraphy**

---

Does your site have the capability to do MIBG?

- Yes  
 No  
 I don't know

---

Have you ever used MIBG in the diagnosis of DLB?

- Yes  
 No

---

How often do you use MIBG in the diagnosis of DLB?

- < 25%  
 25-49%  
 50-75%  
 >75%

---

Why have you not used MIBG?

---

---

In what setting do you think MIBG scintigraphy is the most helpful in the context of DLB?

---

(e.g. MCI stages? Differentiating DLB versus specific other pathology? Please be specific.)

---

Do you have any comments on the use of MIBG scintigraphy?

---

**Polysomnography**

Does your site have the capability to do Polysomnography (PSG)?

- Yes  
 No  
 I don't know

Have you ever used PSG in the diagnosis of DLB?

- Yes  
 No

How often do you use PSG in the diagnosis of DLB?

- < 25%  
 25-49%  
 50-75%  
 >75%

Why have you not used PSG?

---

In what setting do you think PSG is the most helpful in the context of DLB?

(e.g. MCI stages? Differentiating DLB versus specific other pathology? Please be specific.)

Do you have any comments on the use of PSG?

---

**MRI to assess medial temporal lobe structures**

Does your site have the capability to do MRI?

Yes  
 No  
 I don't know

Have you ever used MRI in the diagnosis of DLB?

Yes  
 No

How often do you use MRI in the diagnosis of DLB?

< 25%  
 25-49%  
 50-75%  
 >75%

Why have you not used MRI?

\_\_\_\_\_

In what setting do you think MRI is the most helpful in the context of DLB?

\_\_\_\_\_  
(e.g. MCI stages? Differentiating DLB versus specific other pathology? Please be specific.)

Do you have any comments on the use of MRI?

\_\_\_\_\_

**SPECT/PET perfusion/metabolism scan**

Does your site have the capability to do SPECT/PET perfusion/metabolism?

- Yes  
 No  
 I don't know

Have you ever used SPECT/PET perfusion/metabolism in the diagnosis of DLB?

- Yes  
 No

How often do you use SPECT/PET perfusion/metabolism in the diagnosis of DLB?

- < 25%  
 25-49%  
 50-75%  
 >75%

Why have you not used SPECT/PET perfusion/metabolism?

---

In what setting do you think SPECT/PET perfusion/metabolism is the most helpful in the context of DLB?

(e.g. MCI stages? Differentiating DLB versus specific other pathology? Please be specific.)

Do you have any comments on the use of SPECT/PET perfusion/metabolism?

---

**Quantitative EEG**

Does your site have the capability to do Quantitative EEG?

- Yes  
 No  
 I don't know

Have you ever used Quantitative EEG in the diagnosis of DLB?

- Yes  
 No

How often do you use Quantitative EEG in the diagnosis of DLB?

- < 25%  
 25-49%  
 50-75%  
 >75%

Why have you not used Quantitative EEG?

---

In what setting do you think Quantitative EEG is the most helpful in the context of DLB?

(e.g. MCI stages? Differentiating DLB versus specific other pathology? Please be specific.)

Do you have any comments on the use of Quantitative EEG?

---

**Neuropsychological Testing**

Does your site have the capability to do neuropsychological testing?

- Yes  
 No  
 I don't know

Have you ever used neuropsychological testing in the diagnosis of DLB?

- Yes  
 No

How often do you use neuropsychological testing in the diagnosis of DLB?

- < 25%  
 25-49%  
 50-75%  
 >75%

Why have you not used neuropsychological testing?

---

In what setting do you think neuropsychological testing is the most helpful in the context of DLB?

(e.g. MCI stages? Differentiating DLB versus specific other pathology? Please be specific.)

Do you have any comments on the use of neuropsychological testing?

---

**Cerebrospinal fluid**

Does your site have the capability to do lumbar puncture for cerebrospinal fluid testing?

- Yes  
 No  
 I don't know  
(e.g. for Alzheimer biomarkers)

Have you ever used cerebrospinal fluid testing in the diagnosis of DLB?

- Yes  
 No  
(e.g. for Alzheimer biomarkers)

How often do you use cerebrospinal fluid testing in the diagnosis of DLB?

- < 25%  
 25-49%  
 50-75%  
 >75%  
(e.g. for Alzheimer biomarkers)

Why have you not used cerebrospinal fluid testing?

---

In what setting do you think CSF is the most helpful in the context of DLB?

(e.g. MCI stages? Differentiating DLB versus specific other pathology? Please be specific.)

Do you have any comments on the use of CSF?

---



**Genetics**

Does your site have the capability to do genetic testing?

- Yes  
 No  
 I don't know  
(e.g. for mutations associated with Alzheimer or Lewy body disease)

Have you ever used genetic testing in the diagnosis of DLB?

- Yes  
 No  
(e.g. for mutations associated with Alzheimer or Lewy body disease)

How often do you use genetic testing in the diagnosis of DLB?

- < 25%  
 25-49%  
 50-75%  
 >75%  
(e.g. for mutations associated with Alzheimer or Lewy body disease)

Why have you not used genetic testing?

---

In what setting do you think genetic testing is the most helpful in the context of DLB?

(e.g. MCI stages? Differentiating DLB versus specific other pathology? Please be specific.)

Do you have any comments on the use of genetics?

---

**Other Tests and Comments**

Are there other diagnostic tests or biomarkers that you use?

\_\_\_\_\_

Comments

\_\_\_\_\_
